# Supplementary material
Source: publisher site journal article supplement (https://www.spandidos-publications.com/8544/downloadSupplementary)

Figure S1. Validation of tricellulin OE and knockdown by reverse transcription-quantitative PCR analysis of Marvel2 mRNA in AR42J cells transduced with lentiviral constructs alone. (A) Relative Marvel2 mRNA expression in OE-NC and OE groups. (B) Relative Marvel2 mRNA expression in sh-NC, sh1, sh2 and sh3 groups. GAPDH was used as the internal control. Data are presented as the mean  $\pm$  SD of three independent biological replicates. \*\*\*\* $P < 0.0001$ . NC, negative control; OE, overexpression; sh, short hairpin.

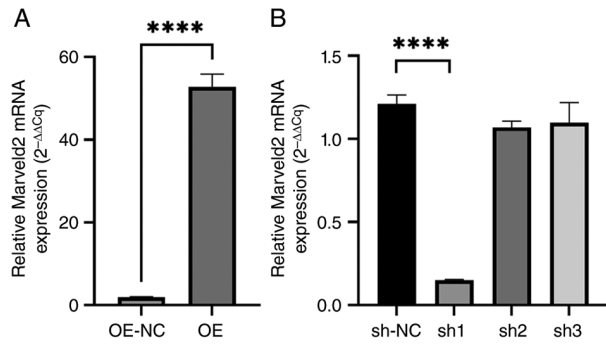

Supplement: Supplementary file 1 [file downloadSupplementary]
